# Supplementary material for: Norwegian Version of the Chelsea Critical Care Physical Assessment Tool (CPAx-NOR): Translation, Face Validity, Cross-Cultural Adaptation and Inter-Rater Reliability
Source: MDPI journal article supplement (doi:10.3390/jcm12155033), 2023-07-31
Supplement: s1 [file s1]

## The Chelsea Critical Care Physical Assessment tool, Norwegian version (CPAx-NOR)

| FYSISK DELFUNKSJON                                                                | NIVÅ 0                                                                                       | NIVÅ 1                                                                  | NIVÅ 2                                                                               | NIVÅ 3                                                                                                                      | NIVÅ 4                                                                                                            | NIVÅ 5                                                                                                              |
|-----------------------------------------------------------------------------------|----------------------------------------------------------------------------------------------|-------------------------------------------------------------------------|--------------------------------------------------------------------------------------|-----------------------------------------------------------------------------------------------------------------------------|-------------------------------------------------------------------------------------------------------------------|---------------------------------------------------------------------------------------------------------------------|
| Respiratorisk funksjon.                                                           | Fullstendig avhengig av respirator. Kontrollert modus. Kan være helt sedert/muskelrelaksert. | Avhengig av respirator. Kontrollert modus med noen spontane pust.       | Puster selv med kontinuerlig invasiv eller non-invasiv ventilasjonsstøtte.           | Puster selv med intermitterende invasiv eller non-invasiv ventilasjonsstøtte ELLER «High-flow» oksygentilskudd (>15 liter). | Får oksygentilskudd (<15 liter)                                                                                   | Selvpuende uten oksygentilskudd.                                                                                    |
| Hoste.                                                                            | Ingen hoste, kan være helt sedert/muskelrelaksert.                                           | Hoste stimuleres kun av dyp suging.                                     | Svak ineffektiv hoste, uten evne til sekret-evakuering, f.eks. behov for dyp suging. | Svak, delvis effektiv hoste, med sporadisk evne til sekret-evakuering, f.eks. behov for sug i munn/svelg.                   | Effektiv hoste, sekret-evakuering ved hjelp av sekretmobiliserende teknikker.                                     | Effektiv hoste, fjerner sekret selvstendig.                                                                         |
| Forflytning i seng f.eks. snu seg.                                                | Kan ikke, kan være helt sedert/muskelrelaksert.                                              | Initierer bevegelsen. Må ha hjelp av ≥2 personer (maksimal).            | Initierer bevegelsen. Må ha hjelp av ≥1 person (moderat).                            | Initierer bevegelsen. Må ha hjelp av 1 person (minimal).                                                                    | Selvstendig på ≥3 sekunder.                                                                                       | Selvstendig på <3 sekunder.                                                                                         |
| Liggende til sittende på sengekant.                                               | Kan ikke/ustabil.                                                                            | Initierer bevegelsen. Må ha hjelp av ≥2 personer (maksimal).            | Initierer bevegelsen. Må ha hjelp av ≥1 person (moderat).                            | Initierer bevegelsen. Må ha hjelp av 1 person (minimal).                                                                    | Selvstendig på ≥3 sekunder.                                                                                       | Selvstendig på <3 sekunder.                                                                                         |
| Sittebalanse (dvs. sitter på sengekanten/ sitter uten støtte).                    | Kan ikke/ustabil.                                                                            | Må ha hjelp av ≥2 personer (maksimal).                                  | Må ha hjelp av ≥1 person (moderat).                                                  | Må ha hjelp av 1 person (minimal).                                                                                          | Selvstendig med noe dynamisk sittebalanse, dvs. kan endre over- kroppens stilling innenfor understøttelsesflaten. | Selvstendig med full dynamisk sittebalanse, dvs. kan strekke seg ut over understøttelsesflaten.                     |
| Stående balanse.                                                                  | Kan ikke/ustabil/sengeleie.                                                                  | Ståseng eller lignende.                                                 | Ståheis eller lignende.                                                              | Avhengig av prekestol, rullator, krykker eller lignende.                                                                    | Selvstendig uten hjelpemidler.                                                                                    | Selvstendig uten hjelpemidler og full dynamisk stående balanse, dvs. kan strekke seg ut over understøttelsesflaten. |
| Sittende til stående (Utgangsstilling: ≤90 grader hoftefleksjon).                 | Kan ikke/ustabil.                                                                            | Sittende til stående med maksimal hjelp, f.eks. ståheis eller lignende. | Sittende til stående med moderat hjelp, f.eks. 1-2 personer.                         | Sittende til stående med minimal hjelp, f.eks. 1 person.                                                                    | Selvstendig fra sittende til stående ved å skyve fra mot armlenene på stolen.                                     | Selvstendig fra sittende til stående uten armbruk.                                                                  |
| Forflytning fra seng til stol.                                                    | Kan ikke/ustabil.                                                                            | Heis.                                                                   | Ståheis eller lignende.                                                              | Lav forflytning (ingen skritt) med forflytningshjelpemiddel eller fysisk hjelp.                                             | Stående forflytning med skritt med forflytningshjelpemiddel ELLER fysisk hjelp.                                   | Selvstendig forflytning uten utstyr.                                                                                |
| Gange.                                                                            | Kan ikke/ustabil.                                                                            | Bruker ståheis eller lignende.                                          | Bruker forflytningshjelpemidler OG hjelp av <1 person (moderat).                     | Bruker forflytningshjelpemidler OG hjelp av 1 person (minimal).                                                             | Bruker forflytningshjelpemiddel ELLER hjelp av 1 person (minimal).                                                | Selvstendig uten hjelp.                                                                                             |
| Gripestyrke (predikert gjennomsnitt for alder og kjønn for den sterkeste hånden). | Kan ikke testes.                                                                             | <20%                                                                    | <40%                                                                                 | <60%                                                                                                                        | <80%                                                                                                              | ≥80%                                                                                                                |

The Chelsea Critical Care Physical Assessment tool, Norwegian version (CPAx-NOR)

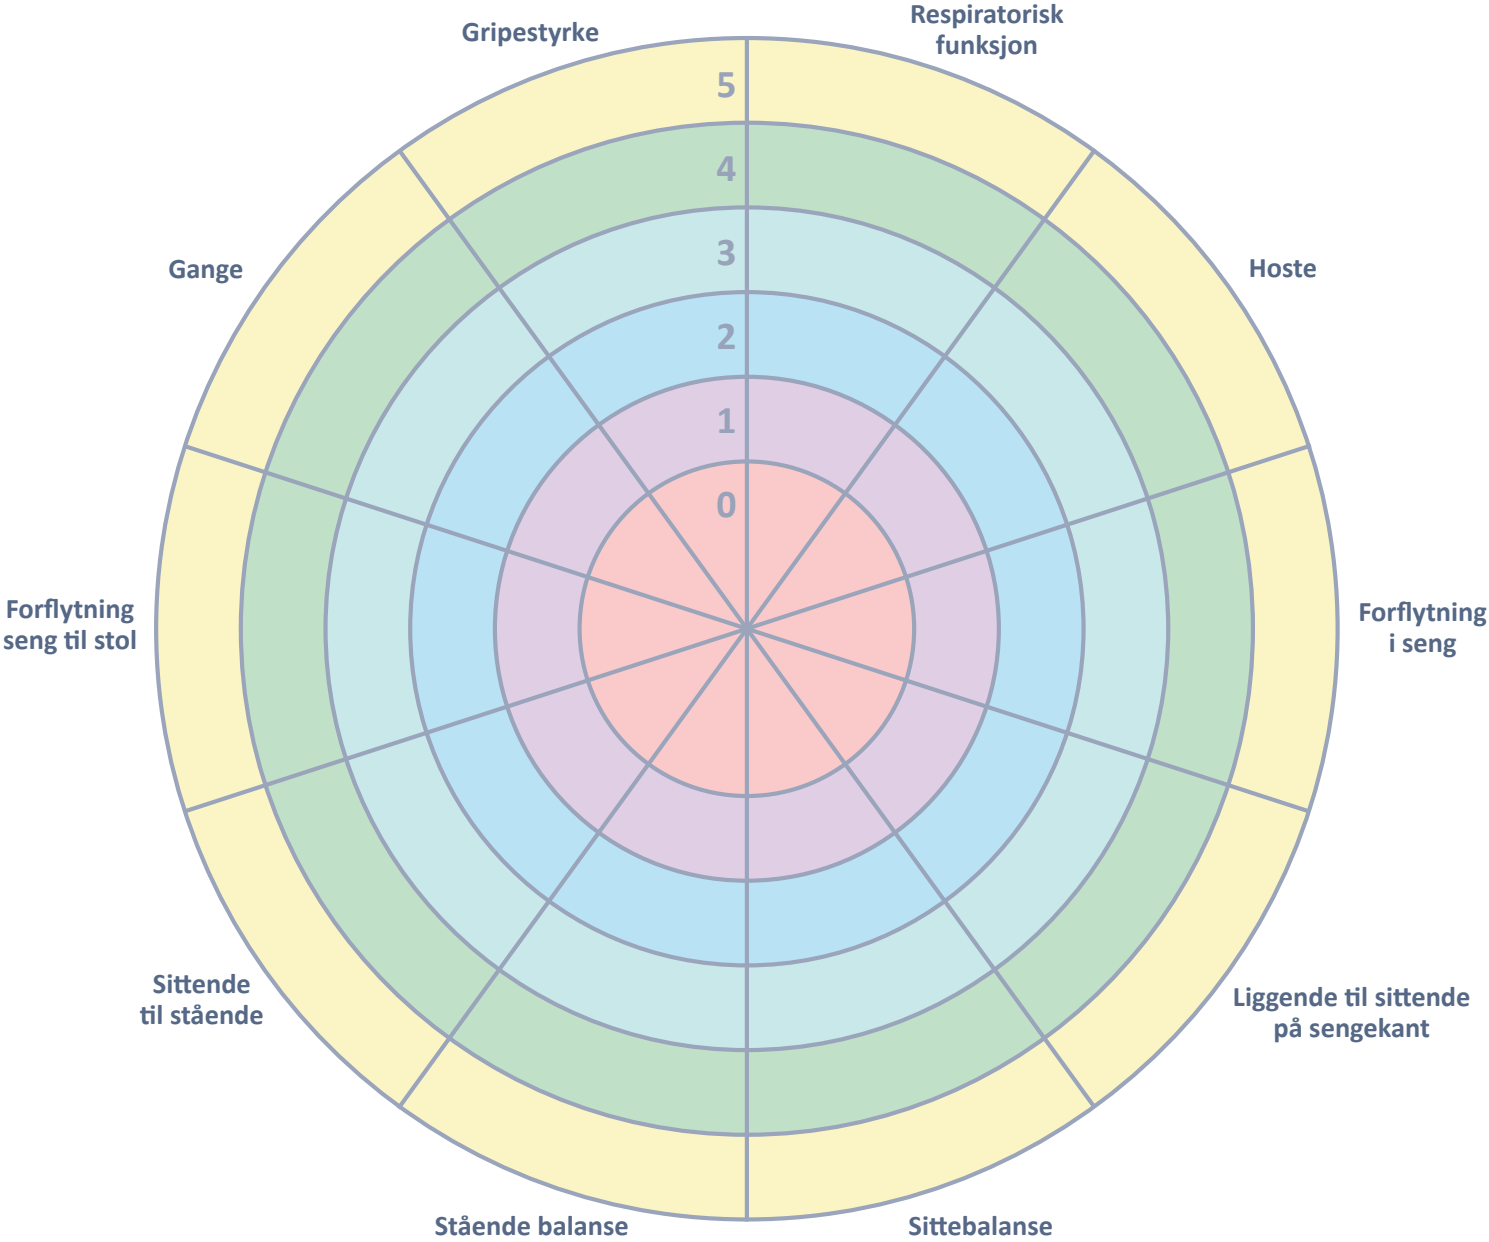

50

## The Chelsea Critical Care Physical Assessment tool, Norwegian version (CPAx-NOR)

| ALDER<br>(år) | MENN |                   |       |       |       |       |       | KVINNER |                   |      |       |       |       |       |
|---------------|------|-------------------|-------|-------|-------|-------|-------|---------|-------------------|------|-------|-------|-------|-------|
|               | Hånd | Gjennom-<br>snitt | <20%  | <40%  | <60%  | <80%  | ≥80%  | Hånd    | Gjennom-<br>snitt | 20%  | <40%  | <60%  | <80%  | ≥80%  |
| 15 til 19     | H    | 46.91             | 9.38  | 18.76 | 28.15 | 37.53 | 37.53 | H       | 28.82             | 5.76 | 11.53 | 17.29 | 23.06 | 23.06 |
|               | V    | 42.13             | 8.43  | 16.85 | 25.28 | 33.70 | 33.70 | V       | 24.98             | 5.00 | 9.99  | 14.99 | 19.98 | 19.98 |
| 20 til 24     | H    | 48.15             | 9.63  | 19.26 | 28.89 | 38.52 | 38.52 | H       | 28.33             | 5.67 | 11.33 | 17.00 | 22.66 | 22.66 |
|               | V    | 43.08             | 8.62  | 17.23 | 25.85 | 34.46 | 34.46 | V       | 25.78             | 5.16 | 10.31 | 15.47 | 20.62 | 20.62 |
| 25 til 29     | H    | 53.76             | 10.75 | 21.50 | 32.26 | 43.01 | 43.01 | H       | 33.82             | 6.76 | 13.53 | 20.29 | 27.06 | 27.06 |
|               | V    | 48.60             | 9.72  | 19.44 | 29.16 | 38.88 | 38.88 | V       | 30.31             | 6.06 | 12.12 | 18.19 | 24.25 | 24.25 |
| 30 til 34     | H    | 52.63             | 10.53 | 21.05 | 31.58 | 42.10 | 42.10 | H       | 33.97             | 6.79 | 13.59 | 20.38 | 27.18 | 27.18 |
|               | V    | 48.98             | 9.80  | 19.59 | 29.39 | 39.18 | 39.18 | V       | 31.64             | 6.33 | 12.66 | 18.98 | 25.31 | 25.31 |
| 35 til 39     | H    | 53.16             | 10.63 | 21.26 | 31.90 | 42.53 | 42.53 | H       | 32.46             | 6.49 | 12.98 | 19.48 | 25.97 | 25.97 |
|               | V    | 51.75             | 10.35 | 20.70 | 31.05 | 41.40 | 41.40 | V       | 29.77             | 5.95 | 11.91 | 17.86 | 23.82 | 23.82 |
| 40 til 44     | H    | 55.49             | 11.10 | 22.20 | 33.29 | 44.39 | 44.39 | H       | 30.34             | 6.07 | 12.14 | 18.20 | 24.27 | 24.27 |
|               | V    | 50.40             | 10.08 | 20.16 | 30.24 | 40.32 | 40.32 | V       | 26.23             | 5.25 | 10.49 | 15.74 | 20.98 | 20.98 |
| 45 til 49     | H    | 49.93             | 9.99  | 19.97 | 29.96 | 39.94 | 39.94 | H       | 35.30             | 7.06 | 14.12 | 21.18 | 28.24 | 28.24 |
|               | V    | 48.94             | 9.79  | 19.58 | 29.36 | 39.15 | 39.15 | V       | 32.06             | 6.41 | 12.82 | 19.24 | 25.65 | 25.65 |
| 50 til 54     | H    | 48.40             | 8.68  | 19.36 | 29.04 | 38.72 | 38.72 | H       | 28.37             | 5.67 | 11.35 | 17.02 | 22.70 | 22.70 |
|               | V    | 41.46             | 8.29  | 16.58 | 24.88 | 33.17 | 33.17 | V       | 26.28             | 5.26 | 10.51 | 15.77 | 21.02 | 21.02 |
| 55 til 59     | H    | 45.71             | 9.14  | 18.28 | 27.43 | 36.57 | 36.57 | H       | 29.76             | 5.95 | 11.90 | 17.86 | 23.81 | 23.81 |
|               | V    | 42.16             | 8.43  | 16.86 | 25.30 | 33.73 | 33.73 | V       | 27.81             | 5.56 | 11.12 | 16.69 | 22.25 | 22.25 |
| 60 til 64     | H    | 40.59             | 8.12  | 16.24 | 24.35 | 32.47 | 32.47 | H       | 26.35             | 5.27 | 10.54 | 15.81 | 21.08 | 21.08 |
|               | V    | 37.25             | 7.45  | 14.90 | 22.35 | 29.80 | 29.80 | V       | 23.47             | 4.69 | 9.39  | 14.08 | 18.78 | 18.78 |
| 65 til 69     | H    | 40.87             | 8.17  | 16.35 | 24.52 | 32.70 | 32.70 | H       | 23.60             | 4.72 | 9.44  | 14.16 | 18.88 | 18.88 |
|               | V    | 36.57             | 7.31  | 14.63 | 21.94 | 29.26 | 29.26 | V       | 23.38             | 4.68 | 9.35  | 14.03 | 18.70 | 18.70 |
| 70 til 74     | H    | 37.48             | 7.50  | 14.99 | 22.49 | 29.98 | 29.98 | H       | 25.84             | 5.17 | 10.34 | 15.50 | 20.67 | 20.67 |
|               | V    | 35.49             | 7.10  | 14.20 | 21.29 | 28.39 | 28.39 | V       | 22.92             | 4.58 | 9.17  | 13.75 | 18.34 | 18.34 |
| 75+           | H    | 32.76             | 6.55  | 13.10 | 19.66 | 26.21 | 26.21 | H       | 19.40             | 3.88 | 7.76  | 11.64 | 15.52 | 15.52 |
|               | V    | 28.59             | 5.72  | 11.44 | 17.15 | 22.87 | 22.87 | V       | 17.64             | 3.53 | 7.06  | 10.58 | 14.11 | 14.11 |

Gilbertson, L. and Barber-Lomax, S. (1994), 'Power and Pinch Grip Strength Recorded Using the Hand-Held Jamar Dynamometer and B+L Hydraulic Pinch Gauge: British Normative Data for Adults', *British Journal of Occupational Therapy*, 57 (12), pp. 483-488.
